# Supplementary material for: Absolute configuration assignment and enantiopurity determination of chiral alkaloids and coumarins derived from O- and C-prenyl epoxidesElectronic supplementary information (ESI) available: crystal data for 17. See http://www.rsc.org/suppdata/cc/b2/b208978e/
Source: Royal Society of Chemistry journal article supplement (doi:10.1039/b208978e), 2002-11-19
Supplement: b208978e.doc [file b208978e.doc]

**Crystal data for 17**: C16H22O6, *Mr* = 310.3, orthorhombic, *a* = 6.1170(10), *b*= 13.2620(10), *c* = 19.993(2) Å, *V* = 1621.9(3) Å3, *T* = 293 K, *Cu-K* radiation, **= 1.5418Å, space group *P*212121, *Z* = 4, *F*(000) = 664, *Dx*= 1.27 g cm-3, ** = 0.81 mm-1, colourless blocks 0.50 x 0.30 x 0.25 mm, Siemens P4 diffractometer, ** scans,  8 < 2 < 140o, measured/independent reflections: 2854/2808, direct methods solution, full matrix least squares refinement on Fo2, anisotropic displacement parameters for non-hydrogen atoms, hydrogens located in difference Fourier but included at positions determined by the geometry of the molecule using the riding model with isotropic vibration parameters, *R*1 =  0.038 for 2305 data with Fo > 4(Fo), 206 parameters, *wR*2 = 0.106 (all data), *GoF* = 1.07, **min,max= ‑0.12/0.14 e Å-3. The absolute configuration could not be determined from the Flack parameter, X = -0.01 (34), but is established as (*R*) relative to the known (1*S*,4*R*) configuration of the camphanate group.
